# Supplementary material
Source: PubMed Central journal article supplement (PMC5716863)
Supplement: NIHMS918349-supplement-Supplementary_Online_Content.pdf [file NIHMS918349-supplement-Supplementary_Online_Content.pdf]

## Supplementary Online Content

Kemppainen KM, Vehik K, Lynch KF, et al; The Environmental Determinants of Diabetes in the Young (TEDDY) Study Group. Association between early-life antibiotic use and the risk of islet or celiac disease autoimmunity. *JAMA Pediatr.* Published online October 9, 2017. doi:10.1001/jamapediatrics.2017.2905

**eFigure 1.** Study Population for Both IA Data Cohort and CDA Data Cohort

**eFigure 2.** Percentage of Children in Each TEDDY Country That Has Reported Use of Each Antibiotic Group

**eTable 1.** List of Medication Ingredients in Each Major Antibiotic Category

**eTable 2.** Antibiotics Use Over Time on Risk of IA, Multiple Islet Autoantibodies, and CDA Examined in Separate Proportional Hazards Model

This supplementary material has been provided by the authors to give readers additional information about their work.

**eFigure 1.** Study Population for Both IA Data Cohort and CDA Data Cohort. Data as of August 31<sup>st</sup> 2014.

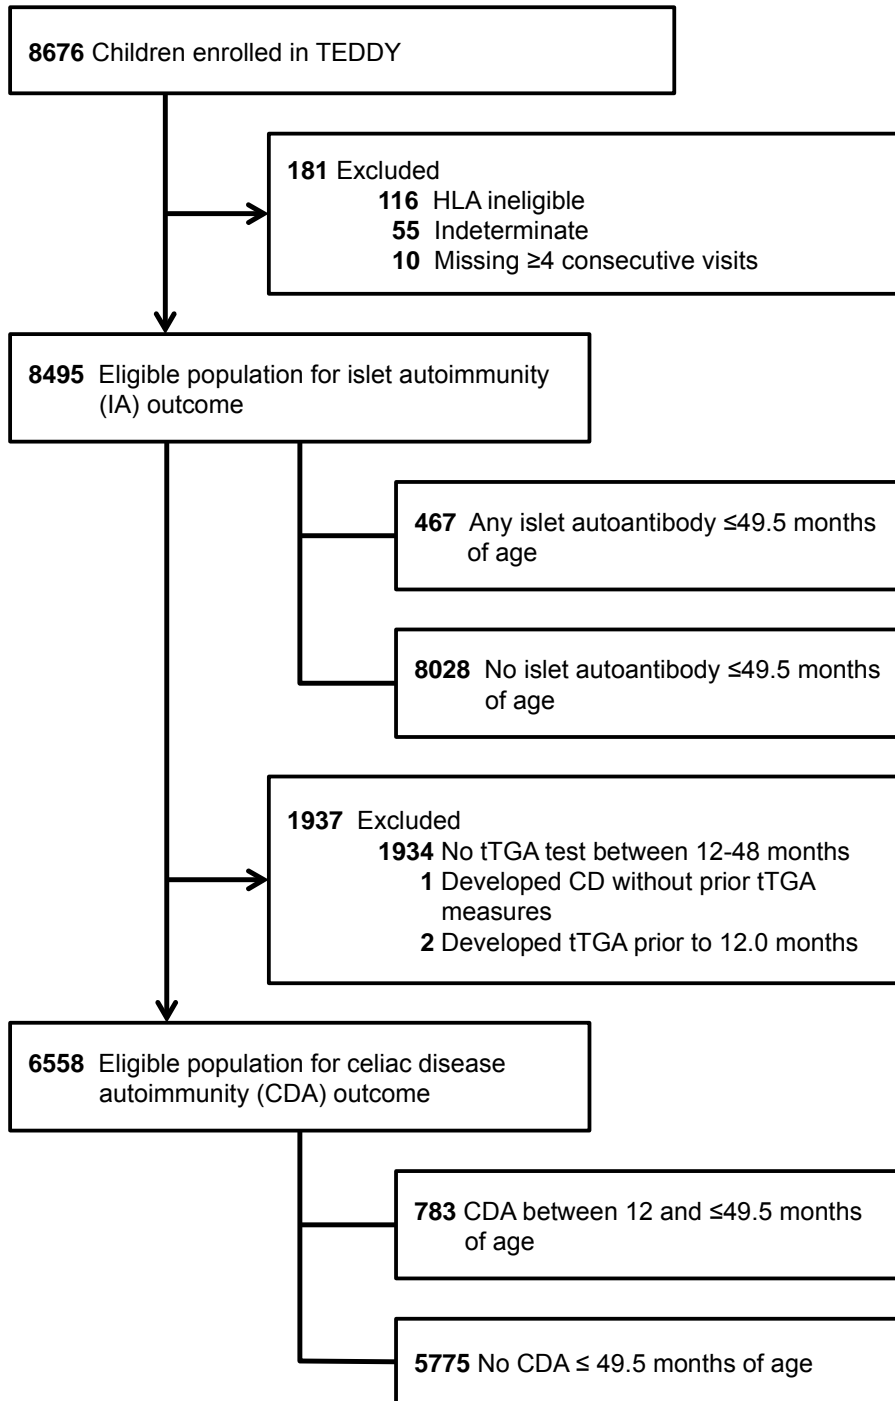

**eFigure 2.** Percentage of Children in Each TEDDY Country That Has Reported Use of Each Antibiotic Group

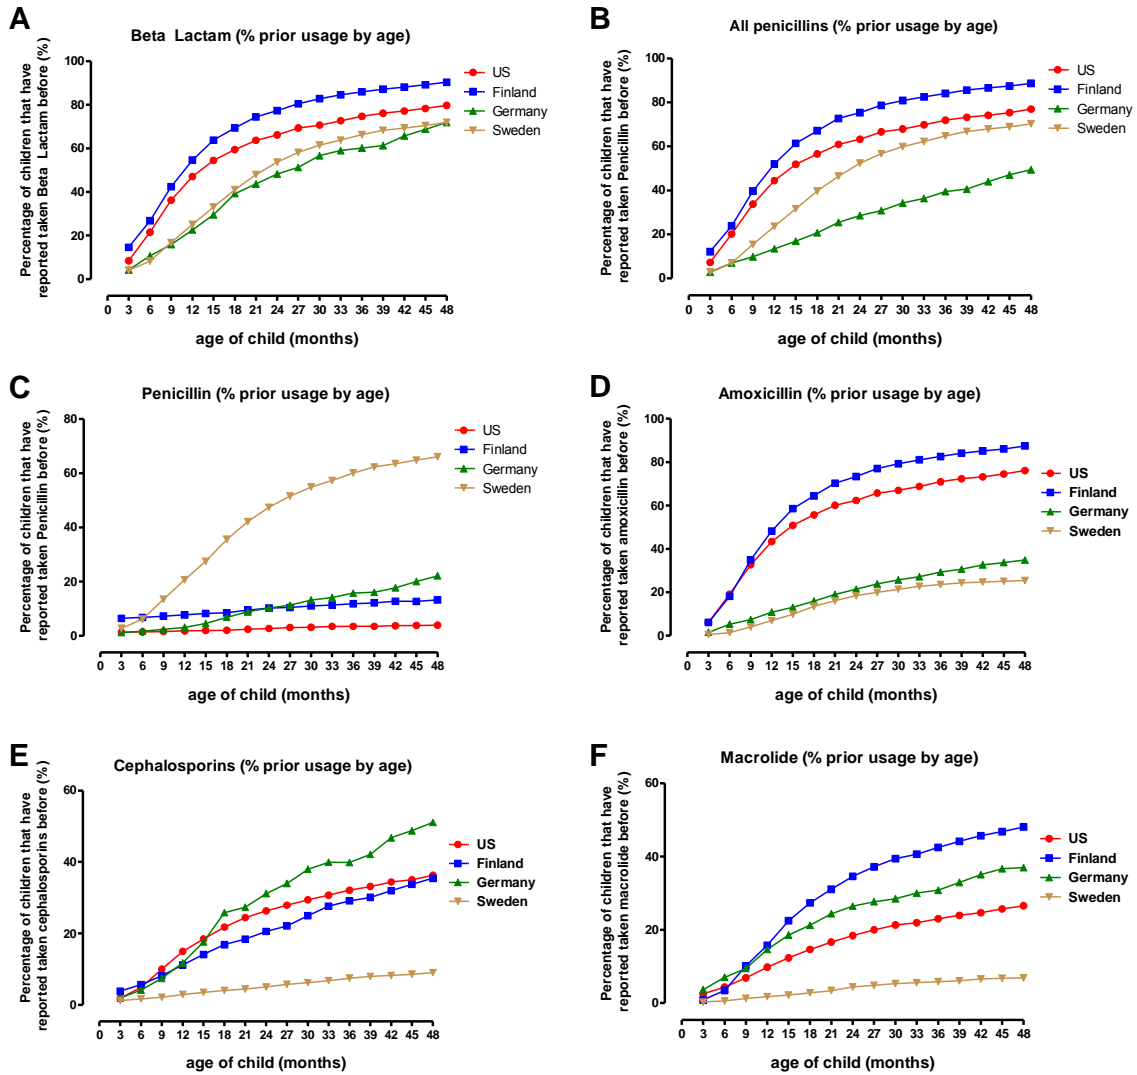

**eTable 1.** List of Medication Ingredients in Each Major Antibiotic Category

| <b>Major antibiotic category</b> | <b>Medication ingredients</b>                     |
|----------------------------------|---------------------------------------------------|
| Amoxicillins                     | Amoxicillin                                       |
|                                  | Amoxicillin + Clavulanic Acid                     |
|                                  | Amoxicillin + Clavulanate                         |
|                                  | Amoxicillin Trihydrate                            |
| Penicillins                      | Amdinocillin Pivoxil                              |
|                                  | Ampicillin                                        |
|                                  | Ampicillin + Sulbactam + Sultamicillin            |
|                                  | Cloxacillin                                       |
|                                  | Dicloxacillin                                     |
|                                  | Floxacillin                                       |
|                                  | Penicillin                                        |
|                                  | Penicillin G                                      |
|                                  | Penicillin V                                      |
| Pivampicillin                    |                                                   |
| Carbapenems                      | Meropenem                                         |
| Macrolides                       | Azithromycin                                      |
|                                  | Clarithromycin                                    |
|                                  | Erythromycin                                      |
|                                  | Erythromycin lactobionate + Colistimethate sodium |
|                                  | Erythromycin + Sulfisoxazole                      |
|                                  | Roxithromycin                                     |
| Spiramycin                       | Spiramycin                                        |
| Cephalosporins                   | Cefaclor                                          |
|                                  | Cefadroxil                                        |
|                                  | Cefazolin                                         |
|                                  | Cefdinir                                          |
|                                  | Cefepime                                          |
|                                  | Cefixime                                          |
|                                  | Cefotaxime                                        |
|                                  | Cefoxitin                                         |
|                                  | Cefpodoxime                                       |
|                                  | Cefprozil                                         |
|                                  | Ceftazidime                                       |
|                                  | Ceftibuten                                        |
|                                  | Ceftriaxone                                       |
|                                  | Ceftriaxone + Lidocaine                           |
|                                  | Cefuroxime                                        |
|                                  | Cephalexin                                        |
| Cephradine                       |                                                   |

|  |            |
|--|------------|
|  | Loracarbef |
|--|------------|

**eTable 2.** Antibiotics Use Over Time on Risk of IA, Multiple Islet Autoantibodies, and CDA Examined in Separate Proportional Hazards Model

| Exposure (/n)                                    | IA                       | Multiple islet autoantibodies | CDA                      |
|--------------------------------------------------|--------------------------|-------------------------------|--------------------------|
|                                                  | HR <sup>a</sup> (95% CI) | HR <sup>a</sup> (95% CI)      | HR <sup>a</sup> (95% CI) |
| <b>Use in the first 6 months of life</b>         |                          |                               |                          |
| Any antibiotic                                   | 0.99 (0.89 – 1.11)       | 0.99 (0.86 – 1.14)            | 1.05 (0.97 – 1.13)       |
| Beta Lactam antibiotic                           | 1.03 (0.91 – 1.15)       | 1.01 (0.87 – 1.18)            | 1.05 (0.97 – 1.15)       |
| Cephalosporins                                   | 0.94 (0.65 – 1.36)       | 1.04 (0.68 – 1.62)            | 1.04 (0.79 – 1.36)       |
| All penicillins                                  | 1.04 (0.92 – 1.19)       | 1.01 (0.85 – 1.20)            | 1.07 (0.97 – 1.18)       |
| Amoxicillin                                      | 1.02 (0.89 – 1.18)       | 1.01 (0.84 – 1.22)            | 1.06 (0.96 – 1.18)       |
| Penicillin                                       | 1.19 (0.83 – 1.71)       | 1.03 (0.62 – 1.70)            | 1.10 (0.82 – 1.48)       |
| Macrolide                                        | 0.66 (0.39 – 1.11)       | 0.77 (0.45 – 1.33)            | 1.04 (0.77 – 1.39)       |
| <b>0-3 months prior to seroconversion period</b> |                          |                               |                          |
| Any antibiotic                                   | 0.99 (0.86 – 1.13)       | 1.06 (0.91 – 1.23)            | 1.11 (1.00 – 1.22)       |
| Beta Lactam antibiotic                           | 0.99 (0.86 – 1.15)       | 1.07 (0.91 – 1.26)            | 1.10 (0.99 – 1.23)       |
| Cephalosporins                                   | 0.66 (0.37 – 1.19)       | 0.38 (0.13 – 1.12)            | 1.12 (0.79 – 1.60)       |
| All penicillins                                  | 1.03 (0.89 – 1.21)       | 1.14 (0.97 – 1.36)            | 1.10 (0.98 – 1.24)       |
| Amoxicillin                                      | 1.03 (0.87 – 1.22)       | 1.14 (0.95 – 1.36)            | 1.13 (1.00 – 1.29)       |
| Penicillin                                       | 1.08 (0.69 – 1.70)       | 1.26 (0.74 – 2.15)            | 0.98 (0.71 – 1.35)       |
| Macrolide                                        | 0.91 (0.58 – 1.45)       | 1.01 (0.61 – 1.69)            | 1.25 (0.91 – 1.72)       |
| <b>3-6 months prior to seroconversion period</b> |                          |                               |                          |
| Any antibiotic                                   | 0.95 (0.82 – 1.09)       | 1.03 (0.88 – 1.20)            | 1.10 (1.00 – 1.21)       |
| Beta Lactam antibiotic                           | 0.96 (0.82 – 1.12)       | 1.05 (0.89 – 1.24)            | 1.11 (1.00 – 1.23)       |
| Cephalosporins                                   | 0.73 (0.42 – 1.28)       | 0.87 (0.47 – 1.60)            | 1.21 (0.88 – 1.67)       |
| All penicillins                                  | 0.98 (0.83 – 1.16)       | 1.08 (0.90 – 1.29)            | 1.11 (0.99 – 1.23)       |
| Amoxicillin                                      | 0.95 (0.79 – 1.15)       | 1.10 (0.91 – 1.33)            | 1.12 (0.99 – 1.26)       |
| Penicillin                                       | 1.17 (0.77 – 1.80)       | 0.91 (0.49 – 1.70)            | 1.08 (0.81 – 1.45)       |
| Macrolide                                        | 0.81 (0.48 – 1.38)       | 0.82 (0.44 – 1.52)            | 1.07 (0.76 – 1.51)       |

Abbreviations: IA, islet autoimmunity; CDA, celiac disease autoimmunity; HR, hazard ratio; CI, confidence interval

<sup>a</sup>Adjusted for HLA, first degree relative status, season of birth, sex, breastfeeding status at 90 days of age, Caesarian Section, maternal antibiotic use in utero, probiotics use started by 90 days of age and country of residence
